# Supplementary material for: Thiol‐Amine‐Based Solution Processing of Cu2S Thin Films for Photoelectrochemical Water Splitting
Source: PubMed Central journal article supplement (PMC8518488; doi:10.1002/cssc.202101347), 2021-08-26
Supplement: CSSC-14-3967-s001.pdf [file CSSC-14-3967-s001.pdf]

# ChemSusChem

Supporting Information

## **Thiol-Amine-Based Solution Processing of Cu<sub>2</sub>S Thin Films for Photoelectrochemical Water Splitting**

Xi Zhang, Wooseok Yang,\* Wenzhe Niu, Pardis Adams, Sebastian Siol, Zhenbin Wang, and S. David Tilley\*© 2021 The Authors. ChemSusChem published by Wiley-VCH GmbH. This is an open access article under the terms of the Creative Commons Attribution License, which permits use, distribution and reproduction in any medium, provided the original work is properly cited.

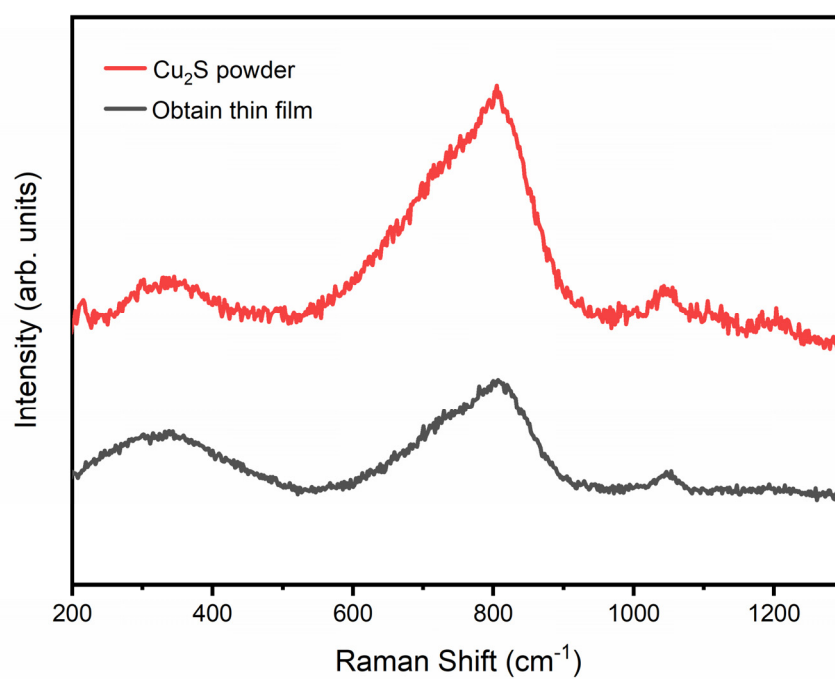

**Figure S1.** Raman spectra of Cu<sub>2</sub>S powder and the obtained thin film.

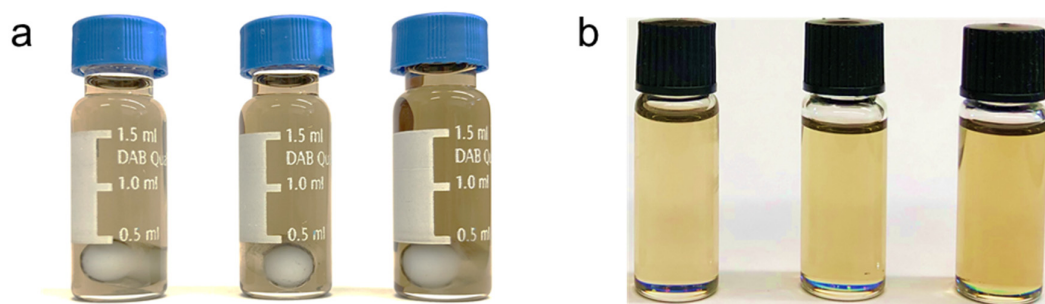

**Figure S2.** Optical images of 0.6, 0.8 and 1.0 M Cu-S molecular inks (a) before and (b) after filtering with 0.2 μm PTFE filters.

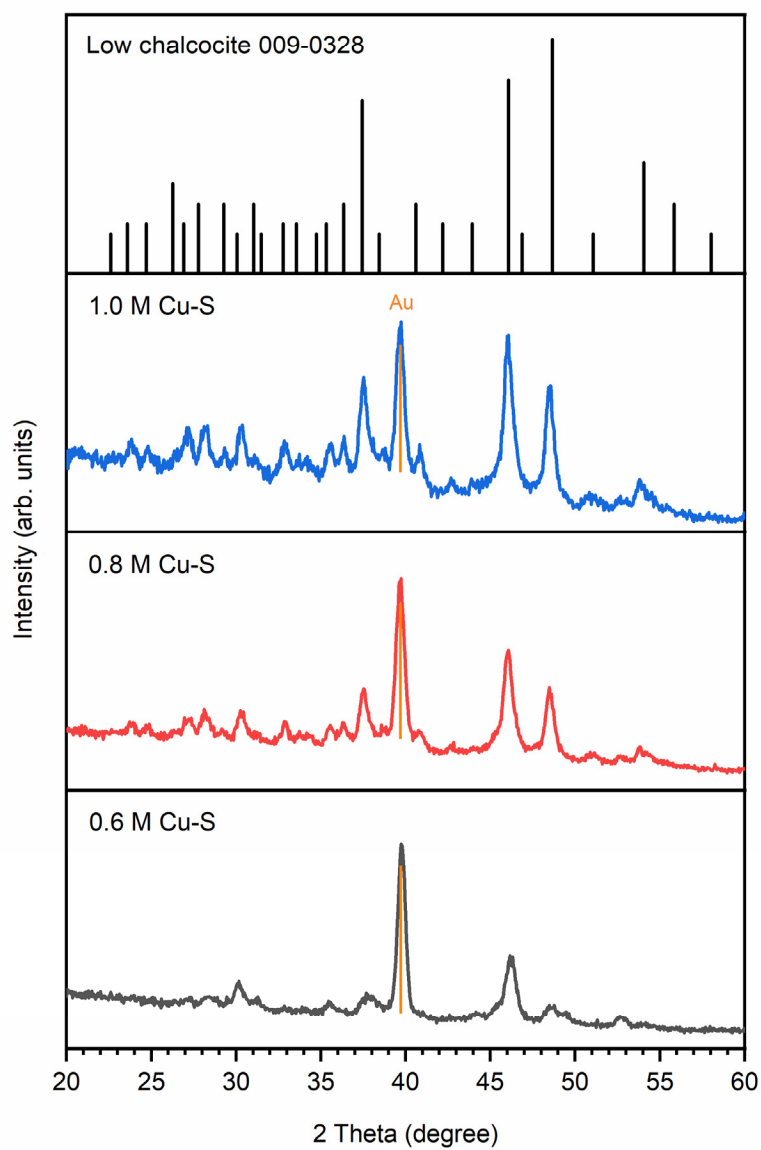

**Figure S3.** Grazing incidence XRD patterns of 3 coats- $\text{Cu}_2\text{S}$  thin films prepared from 0.6 M, 0.8 M and 1.0 M Cu-S molecular inks and low chalcocite JCPDS 009-0328.

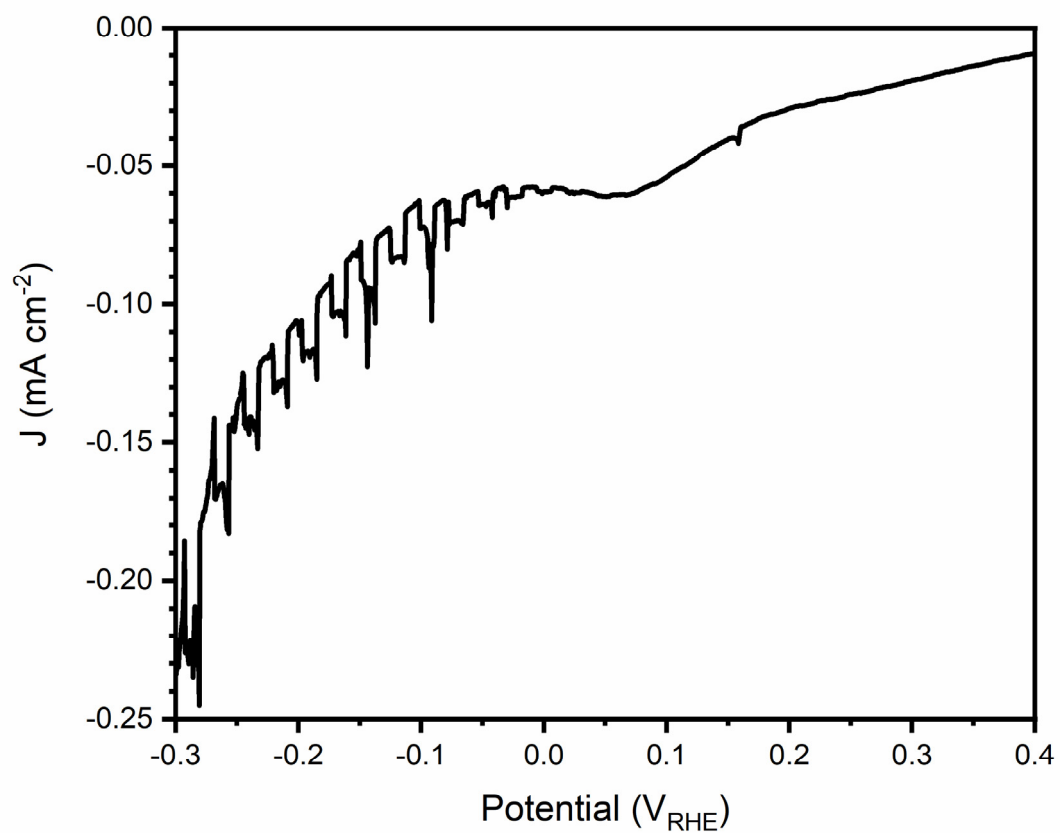

**Figure S4.** *J-E* curve of the bare Cu<sub>2</sub>S thin film prepared from 0.8 M Cu-S molecular ink under simulated chopped AM 1.5 G illumination (100 mW cm<sup>-2</sup>).

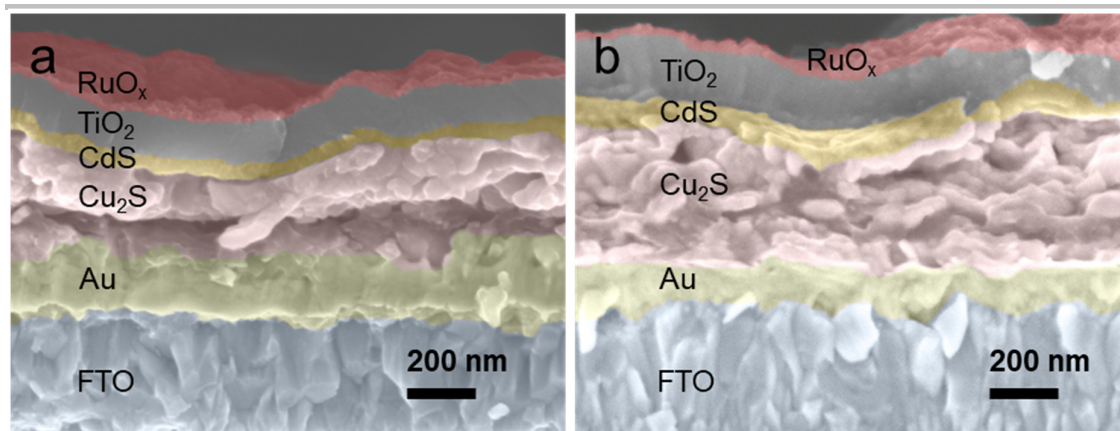

**Figure S5.** Cross-sectional false-colored SEM images of Cu<sub>2</sub>S photocathodes based on Cu<sub>2</sub>S thin films prepared from (a) 0.6 M and (b) 1.0 M Cu-S molecular inks.

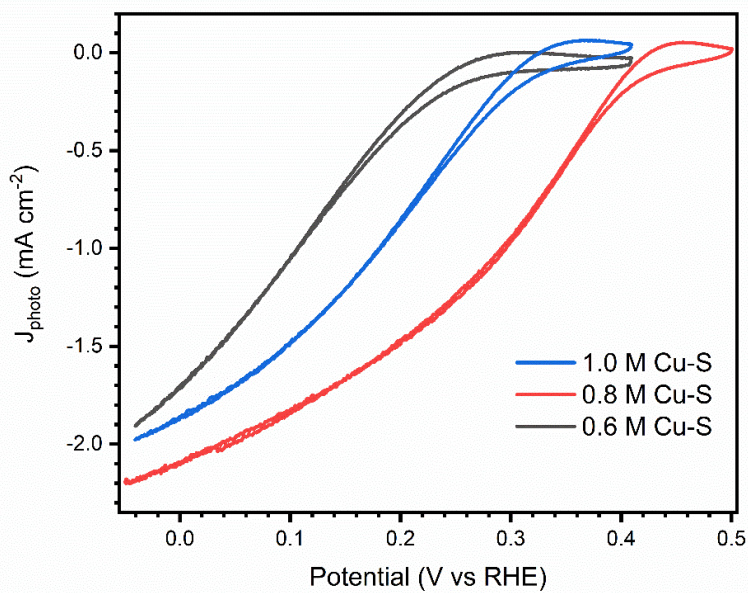

**Figure S6.** Cyclic voltammetry (CV) scans of  $\text{Cu}_2\text{S}$  photocathodes based on  $\text{Cu}_2\text{S}$  thin films prepared from 0.6 M, 0.8 M and 1.0 M Cu-S molecular inks.

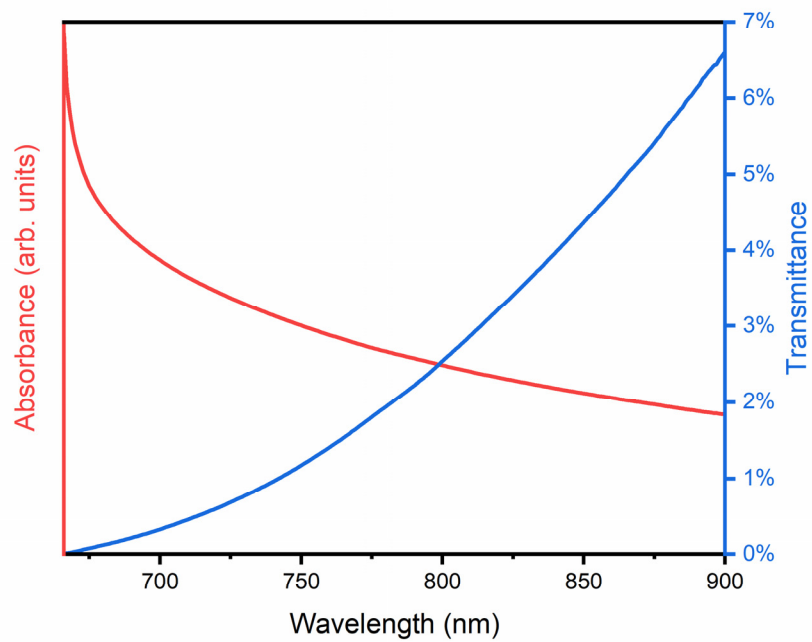

**Figure S7.** UV-Vis absorbance and transmittance spectra of the  $\text{Cu}_2\text{S}$  thin film prepared from 0.8 M Cu-S molecular ink measured in transmission mode.
